# Supplementary material
Source: PubMed Central journal article supplement (PMC2887567)
Supplement: supp_91_1_74__1.pdf [file supp_91_1_74__1.pdf]

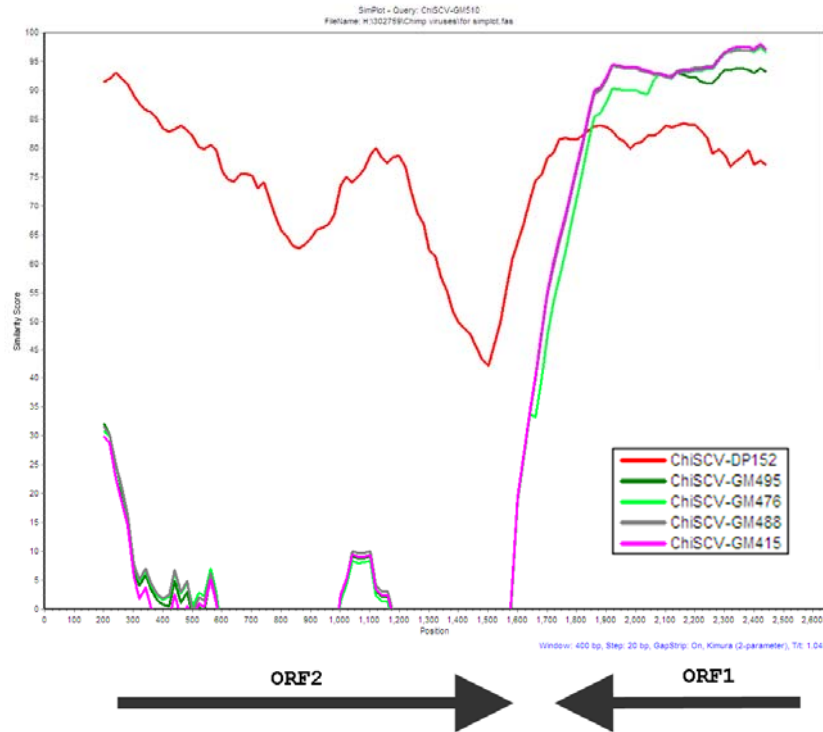

Supplementary Fig. S1. Recombination analyses. (a) Sliding window SimPlot of ChiSCV-GM510 against other ChiSCVs (except for the shorter ChiSCV-GT306 sequence). The nucleotide position is shown on the *x*-axis, the per cent nucleotide sequence similarity is shown on the *y*-axis. The positions of the major ORFs are indicated by arrows.
